1 TITLE: Would an RRS by any other name sound as RAD?

2

3 AUTHORS

4 Erin O Campbell<sup>1\*</sup>, Bryan M T Brunet<sup>1</sup>, Julian R Dupuis<sup>2</sup>, and Felix A H Sperling<sup>1</sup>

5

6 AFFILIATIONS

7 <sup>1</sup>Department of Biological Sciences, CW405 BioSciences Centre, University of Alberta,

8 Edmonton, Alberta, Canada T6G 2E9

9 <sup>2</sup>Department of Plant and Environmental Protection Sciences, University of Hawai'i at Mānoa,

10 Honolulu, Hawai'i, United States of America 96822

11

12 \*CORRESPONDENCE: [cocampbe@ualberta.ca](mailto:cocampbe@ualberta.ca)

13

14 KEYWORDS

15 RADseq, GBS, reduced representation sequencing, RRL, next-generation sequencing

16

17 ABSTRACT

18 Sampling markers throughout a genome with restriction enzymes emerged in the 2000s as  
19 reduced representation shotgun sequencing (RRS). Rapid advances in sequencing technology  
20 have since spurred modifications of RRS, giving rise to many derivatives with unique names,  
21 such as RADseq. But naming conventions have often been more creative than consistent, with  
22 unclear criteria for recognition as a unique method resulting in a proliferation of names  
23 characterized by ambiguity. We conducted a literature review to assess methodological and  
24 etymological relationships among 36 restriction enzyme-based methods, as well as rates of  
25 correct referencing of commonly-used methods. We identify several instances of methodological  
26 convergence or misattribution in the literature, and note that many published derivatives have  
27 modified only minor elements of parent protocols. We urge greater restraint in naming derivative  
28 methods, to strike a better balance between clarity, recognition of scientific innovation, and  
29 correct attribution.

30

## 31 INTRODUCTION

32           Recent advances in next-generation sequencing (NGS) have given researchers access to  
33 unprecedented amounts of genomic data. The versatility of NGS, exemplified by its myriad  
34 applications to biology (Andrews *et al.* 2016), is arguably one of its greatest assets and has in turn  
35 led to more than 400 published methods that use this technology (Hadfield & Retief 2018). While  
36 NGS has indisputably spurred rapid innovation across biology, associated names have also  
37 proliferated. These names are commonly acronyms meant to clearly identify a methodology or  
38 application but, due to their sheer numbers, are now themselves a source of confusion. A set of  
39 suggested guidelines for the use of such acronyms was published several years ago (NUAP  
40 2011), but Hadfield & Retief (2018) have recently reignited this conversation, discussing the  
41 excess of names for NGS methods but not analyzing their patterns of naming, publication, or  
42 citation

43           Methods that use restriction enzymes to sample genomes represent an informative subset  
44 of NGS techniques to explore in this context. These methods provide diverse options for reducing  
45 genomic complexity and surveying large numbers of loci across populations or species, and are  
46 widely used in ecology and evolutionary biology (Baird *et al.* 2008; Davey *et al.* 2011). Early  
47 approaches include reduced representation shotgun sequencing (RRS, Altshuler *et al.* 2000) and  
48 Complexity Reduction of Polymorphic Sequences (CRoPs<sup>TM</sup>, van Orsouw *et al.* 2007), which  
49 have since served as springboards for derivative techniques, most of them published with unique  
50 names. At least 36 of these methods have been published as of December 2017 (Table S1).

51           Two methods in particular, Restriction site-associated DNA sequencing (RADseq, Baird  
52 *et al.* 2008) and Genotyping-by-Sequencing (GBS, Elshire *et al.* 2011), have been modified for  
53 diverse work on association and genetic mapping, population structure, and shallow-scale

54 phylogenetic relationships (Poland *et al.*, 2012; Baird *et al.*, 2013; Narum *et al.*, 2013; Eaton,  
55 2014). They are so popular that 26 methods have explicitly been modified from either RADseq or  
56 GBS (Table S1), with their increasing importance demonstrated by recent reviews (Davey *et al.*,  
57 2011; Andrews *et al.*, 2016; Jiang *et al.* 2016), as well as debates (e.g. Andrews & Luikart (2014)  
58 and Puritz *et al.* (2014), and Lowry *et al.* (2016, 2017), McKinney *et al.* (2017), and Catchen *et*  
59 *al.* (2017)). Although reviews have tried to distinguish these approaches, it is clear from these  
60 publications as well as informal discussion on online forums (Table S2) that differences between  
61 many techniques are perceived to be minor and subtle. Naming conventions for derivatives have  
62 been variable and inconsistent, and literature discussing or employing these techniques has been  
63 ambiguous about the origins of techniques as well as which names to use as “catch-all” terms.

64 For instance, “GBS” is sometimes used to refer to all restriction-based methods  
65 collectively (e.g. Franchini *et al.* 2017), while other authors take the opposite approach and use  
66 “RADseq” as the generic term (e.g. Hoffberg *et al.* 2016). Two-enzyme, or double digest,  
67 adaptations of these techniques are similarly ambiguous; Peterson *et al.* (2012) has been credited  
68 with developing this approach (see Andrews *et al.* 2016) and did coin the term ddRAD to expand  
69 on the already-popular single-enzyme RADseq approach (Baird *et al.* 2008), but the CRoPS<sup>TM</sup>  
70 protocol (van Orsouw *et al.* 2007) was the first RRS method to do this. Some authors even give a  
71 common acronym a new meaning. For example, NextRAD (Fu *et al.* 2017) was developed by  
72 authors of the original RADseq papers (Miller *et al.* 2007; Baird *et al.* 2008) but uses RAD in this  
73 derived protocol to stand for Reductively-Amplified DNA. Thus, reduced representation genome  
74 sampling methods (hereafter referred to as RRS methods after Altshuler *et al.* 2000) exemplify  
75 the naming problem that is now typical of NGS methods.

76           Given the proliferation of RRS methods and ambiguity of their naming conventions  
77 (Jiang *et al.* 2016), we have sought to characterize RRS methods in a literature review and meta-  
78 analysis. We asked two main questions. First, what are the trends or criteria for naming new  
79 methods? And second, are researchers citing and referring to methods correctly? To answer these  
80 questions, we summarized the methodological and etymological relationships of these techniques  
81 in a concept map, and then conducted a meta-analysis of citation metrics to investigate patterns of  
82 literature referencing.

83

## 84 METHODS

### 85 *Literature review and concept mapping*

86           We compiled a list of RRS methods published on or before 31 December 2017 (N = 36),  
87 and evaluated approaches based on their methodological characteristics (Table S2). We then  
88 created a conceptual map of all methods, linking each derived technique to the main protocol that  
89 served as the basis for the modification, as specified by the authors (Fig. 1). In several cases a  
90 parent protocol was not directly specified, and in these instances, we linked methods based on  
91 overall methodological similarity. The subjective construction of this map reflects our experience  
92 as typical arms-length users of several of these approaches. Any technique that explicitly altered  
93 a protocol was considered a direct modification, and in this conceptualized map, a separate node.  
94 We plotted defining characteristics for each derivative along the connecting branches to assess  
95 distinctiveness or methodological convergence. Defining characteristics were generally those  
96 considered by the authors of the protocol to distinguish the derived method from its parent. To  
97 preserve clarity, characteristics that were highly variable across methods (for instance barcode  
98 and adaptor design and the overall order of methodological steps in each protocol) were not

99 plotted on the map unless they were definitive for the method(s). We also downloaded complete  
100 citation data from Web of Science® for the 36 methods, and determined the average number of  
101 citations per year for each publication. The size of ellipses in Fig. 1 reflects these numbers.

102

### 103 *Meta-analysis of commonly used RRS approaches*

104 To assess whether methods are recognized and attributed accurately in the literature, we  
105 reviewed all journal articles citing one- and two-enzyme RADseq and GBS (RADseq, Baird *et al.*  
106 2008; GBS, Elshire *et al.* 2011; two-enzyme GBS, Poland *et al.* 2012; and ddRAD, Peterson *et*  
107 *al.* 2012), as well as Sequence-based Genotyping (SBG, Truong *et al.* 2012). RADseq, GBS, two-  
108 enzyme GBS and ddRAD are four of the most widely cited RRS approaches, and have been  
109 extensively modified to form the basis of many derivative methods. While the SBG protocol of  
110 Truong *et al.* (2012) is far less frequently cited, we included it for its methodological and  
111 etymological similarity to these methods as well as its date of publication, which occurred  
112 between that of Poland *et al.* (2012) and Peterson *et al.* (2012). It is also the subject of U.S. patent  
113 8,815,512 B2, owned by KeyGene, which claims legal ownership and protection of all methods  
114 that simultaneously discover and genotype single nucleotide polymorphisms, including RADseq,  
115 GBS, two-enzyme GBS and ddRAD (KeyGene 2016).

116 Complete citation lists were downloaded from Web of Science® on 6 February 2018 for  
117 the period up to and including 31 December 2017 for each of Baird *et al.* (2008), Elshire *et al.*  
118 (2011), Poland *et al.* (2012), Truong *et al.* (2012), and Peterson *et al.* (2012). The lists were then  
119 combined and filtered to remove duplicates (Table S3). Only articles whose titles, abstracts, or  
120 keywords contained “GBS”, “SBG” or “RAD” (and all variant search strings in Table S4) were  
121 retained for further analysis. Incorrect name usage was defined as any case of an alternate name

122 being used to refer to a technique (e.g. “RAD” to describe the GBS protocol of Elshire *et al.*  
123 (2011)). Strings for “two-enzyme GBS” and “ddRAD” were not searched separately since these  
124 were treated as variants of “GBS” and “RAD”, respectively. A complete description of the  
125 methods used in the literature review is in Table S6.

126

## 127 RESULTS

### 128 *Construction of RRS conceptual map*

129 Of the 36 RRS methods we examined, those of Baird *et al.* (2008), Peterson *et al.* (2012),  
130 and Elshire *et al.* (2011) are the precursors of the greatest number of directly derived methods  
131 (Fig. 1), and the most highly cited (Table S2). “RAD” was used in 18 named techniques, while  
132 “GBS” was used in 6 and the remaining 12 methods had names that lacked “RAD”, “GBS”, or  
133 any specified name at all (see Sonah *et al.* 2013 and Mascher *et al.* 2013). Many derived methods  
134 were named after the protocol they modified (e.g.: ddRAD (Peterson *et al.* 2012) from RADseq  
135 (Baird *et al.* 2008)), but there were several exceptions (e.g., SBG (Truong *et al.* 2012) from  
136 CRoPS<sup>TM</sup> (van Orsouw *et al.* 2007)). We observed multiple occurrences of methodological  
137 convergence across methods, including the use of paired restriction enzymes in double digest  
138 methods, sequence capture, bisulfite sequencing, and the use of PCR amplification to create  
139 reduced representation libraries, which we discuss below.

140

### 141 *Meta-analysis of GBS, SBG and RAD citation accuracy*

142 The number of journal articles that refer to “GBS”, “SBG”, or “RAD” within their title,  
143 abstract or keywords and uniquely cite either Baird *et al.* (2008), Elshire *et al.* (2011), Poland *et*  
144 *al.* (2012), Truong *et al.* (2012), or Peterson *et al.* (2012) has increased rapidly since 2010, with

145 the greatest number of citations occurring in 2017. Of a total of 788 journal articles, 335 (42.5%)  
146 refer only to GBS, 2 (0.2%) refer only to SBG, and 418 (53.1%) refer only to RAD (Fig. 2; Table  
147 S5). Two or more of these names (“Multiple( $\geq 2$ )”) are used in only 33 (4.3%) journal articles and  
148 these refer only to GBS and RAD, not SBG (Fig. 2; Table S5).

149 Each name has been used inconsistently to refer to methods described by their parent  
150 publications, but to varying degrees: 8% (28/349) of publications that uniquely cite Elshire *et al.*  
151 (2011) or Poland *et al.* (2012) refer to SBG or RAD alone or in combination with GBS; 66.7%  
152 (2/3) of publications that uniquely cite Truong *et al.* (2012) refer to GBS or RAD alone or in  
153 combination with SBG; and 8.3% (36/436) of publications that uniquely cite Baird *et al.* (2008)  
154 or Peterson *et al.* (2012) refer to GBS or SBG alone or in combination with RAD (Fig. 2; Tables  
155 S3 and S5). Thus, use of ambiguous or incorrect names are apparent in about 8.4% of journal  
156 articles citing these five papers.

157

## 158 DISCUSSION

159 We have applied a review and literature meta-analysis to characterize the naming and use  
160 of RRS methods. Our concept map shows that RAD-based methods are more numerous than  
161 GBS-based methods. Although derived methods are often given unique names, most follow some  
162 of the etymological elements of the parent technique that was modified, even when derived  
163 protocols from different camps converge methodologically (Fig. 1). We also identified a rate of  
164 ~8.4% ambiguous or incorrect citations for these methods (Fig. 2).

165 The RAD acronym leads the popularity race when considering citations for RAD-based  
166 methods as well as the number of derivative protocols bearing this term; GBS-based methods  
167 have fewer overall citations and methodological offspring. While the original RAD or modified



168 ddRAD methods may simply be more methodologically attractive, unconscious linguistic factors  
169 in the naming of derivatives may also be contributing to this trend. Acronyms that form simple,  
170 recognizable words are more likely to be remembered (NUAP 2011), so this may explain use of  
171 the RAD acronym despite citation of a GBS or SBG publication (Fig. 2). RAD has also proven to  
172 be easy to incorporate into memorable titles that improve name recognition and visibility in a  
173 rapidly expanding field (e.g. “Demystifying the RAD fad” (Puritz *et al.* 2014); “Breaking RAD”  
174 (Lowry *et al.* 2016); present study). However, rates of potential misattribution do not appear to be  
175 biased toward RAD over GBS (Fig. 2), and so researchers who are unclear or unconvinced of the  
176 distinctions between methods may simply be randomly using both terms as synonyms.  
177 Methodological convergence by several GBS- and RAD-based techniques (Fig. 1) could  
178 contribute to further ambiguity among methods.

179 “*What’s in a name?*” (Shakespeare 1594-98). Separate publication of a method implies  
180 that the authors consider the new method to be substantively different from other published  
181 methods, thereby warranting a separate name. But for RRS methods, differences between many  
182 techniques are minor, often primarily implementing streamlined library preparation and cost  
183 reduction (e.g.: GGRS (Chen *et al.* 2013), ezRAD (Toonen *et al.* 2013)), or adaptations that  
184 optimize methods for specific groups of organisms (e.g.: MiddRAD, Yang *et al.* 2016). Many  
185 published methods arguably do not meet this criterion for publication (NUAP 2011). And while  
186 some RRS methods have made larger methodological changes, for instance the use of sequence  
187 capture or bisulfite sequencing, the publication of these methods is problematic for other reasons.

188 Naming of a method also suggests ownership over that method (NUAP 2011). In cases  
189 where only minor changes were made to an existing protocol, the authors of the new method  
190 profit from advances made by prior authors, which may comprise the bulk of the methodology.

191 The broad convergence of several methods in Fig. 1 creates an additional layer of complexity, as  
192 two separate groups of authors are essentially claiming ownership over similar techniques that  
193 have different names. For instance, ddRADseq-ion (Recknagel *et al.* 2015) and GBS for  
194 semiconductor sequencing platforms (Mascher *et al.* 2013) have both incorporated double digests  
195 and modified adaptors for Ion Torrent sequencing. EpiGBS (van Gurp *et al.* 2016) and bs-  
196 RADseq (Trucchi *et al.* 2016) both incorporate bisulfite sequencing, and several methods have  
197 employed some form of sequence capture (Spiked GBS (Rife *et al.* 2016); RADcap (Hoffberg *et*  
198 *al.* 2016); HyRAD (Suchan *et al.* 2016); Rapture (Ali *et al.* 2016); 3RAD (Graham *et al.* 2015);  
199 hyRADx (Schmid *et al.* 2017)).

200 While each technique is prone to distinct biases and technical difficulties (van Dijk *et al.*  
201 2014; Flanagan & Jones 2017), we argue that most RRS methods are sufficiently similar that they  
202 can be adapted to a user-specified combination of characteristics that suit the needs of an  
203 individual study. The recently upheld US KeyGene patent covering these methods also seems to  
204 suggest that, at least from a legal standpoint, they are not significantly different from one another  
205 (US Patent 8,815,512 B2). So why do we keep naming derivative methods, and how can we work  
206 to preserve clarity of communication in discussing them?

207 “*Action is eloquence*” (Shakespeare 1605-08). Rapid sequencing advances may have  
208 unwittingly created a sense of momentum among researchers, thereby fostering the proliferation  
209 of names for genome-sampling techniques. Almost half of the methods in Fig. 1 and all five of  
210 the key methods in Fig. 2 were published in *PLoS ONE*, which has published several RRS  
211 derivatives within the same years. Other journals have also published multiple derivative  
212 methods, although to a lesser degree. Several researchers have also been involved the naming and  
213 publication of more than one method, indicating research groups developing suites of techniques.

214           This suggests a preoccupation with name recognition as a means to increase the visibility  
215 of research. We recognize that catchy titles are not inherently negative or irresponsible, and that  
216 this practice can beneficially increase the impact of research. But the recent “modify, name, and  
217 publish” trend seems more likely to be driven by efforts to increase citations, which dilutes the  
218 eloquence of acronyms. This system further confers risk to researchers who choose not to name  
219 an adapted technique, by leaving a door open for someone else to employ the same change and  
220 name it, taking the credit. Because academic success is so closely tied to citation metrics, there is  
221 little incentive to take the high road.

222           It is instructive to compare reliance on easy-to-digest acronyms to online clickbait  
223 headlines in academic publishing and research. An example may be the recent publication of an  
224 incendiary essay presumably to increase the impact of a journal despite the article not passing  
225 peer review (Flaherty 2017). Academic metrics do not distinguish between “good” and “bad”  
226 citations (Gallien & Roelofs 2017), and we are incentivized to market our research beyond the  
227 merit of the research itself. Sequencing technology will undoubtedly continue to advance  
228 (Goodwin *et al.* 2016), and new RRS approaches will continue to evolve. Exploring the utility  
229 and limitations of these approaches has resulted in a wealth of biological knowledge that has been  
230 hitherto out of reach. At this level, Shakespeare’s immortal phrase got it right: “a rose by any  
231 other name would smell as sweet” (Shakespeare 1591-94). But Linnaeus may have disagreed  
232 with this sentiment – names *do* matter because they serve to communicate and organize the world  
233 around us.

234           We add our voices to those of Hadfield & Retief (2018); our scientific community would  
235 be better served by greater restraint in naming new techniques, except for indisputably large  
236 methodological innovations. Continued adaptation of methods is clearly beneficial, but the

237 publication of new names for minor changes in existing NGS methodologies is a symptom of a  
238 larger cultural shift in academia. And the responsibility for righting that course lies with us as  
239 researchers, editors, and publishers.

240

#### 241 AUTHOR CONTRIBUTIONS

242 EOC, BMTB, JRD, and FAHS contributed to the study design and draft revisions. EOC and  
243 BMTB conducted the literature review and meta-analysis, and wrote the manuscript.

244

#### 245 ACKNOWLEDGEMENTS

246 This work was supported in part by an NSERC Discovery Grant to FAH Sperling (RES0016259).

247

#### 248 COMPETING INTERESTS

249 The authors have no competing interests.

250 REFERENCES

- 251 Acquadro, A., Barchi, L., Portis, E., Carrasquilla-Garcia, N., Tirone, M., Lanteri, S., & Comino,  
252 C. (2016) RAD2seq: an efficient protocol for plant genotyping by sequencing. *Acta*  
253 *Horticulturae*, **1147**, 1-8.
- 254 Ali, O. A., O'Rourke, S. M., Amish, S. J., Meek, M. H., Luikart, G., Jeffres, C., & Miller, M. R.  
255 (2016) RAD Capture (Rapture): Flexible and Efficient sequence-based genotyping.  
256 *Genetics*, **202**, 389-400.
- 257 Altshuler, D., Pollara, V. J., Cowles, C. R., Van Etten, W. J., Baldwin, J., Linton, L., & Lander,  
258 E. S. (2000) An SNP map of the human genome generated by reduced representation  
259 shotgun sequencing. *Nature*, **407**, 513-516.
- 260 Andolfatto, P., Davison, D., Erezylmaz, D., Hu, T. T., Mast, J., Sunayama-Morita, T., & Stern,  
261 D. L. (2011) Multiplexed shotgun genotyping for rapid and efficient genetic mapping.  
262 *Genome Research*, **21**, 610-617.
- 263 Andrews, K. R., Good, J. M., Miller, M. R., Luikart, G., & Hohenlohe, P. A. (2016) Harnessing  
264 the power of RADseq for ecological and evolutionary genomics. *Nature Reviews*  
265 *Genetics*, **17**, 81-92.
- 266 Andrews, K. R., & Luikart, G. (2014) Recent novel approaches for population genomics data  
267 analysis. *Molecular Ecology*, **23**, 1661-1667.
- 268 Baird, N. A., Etter, P. D., Atwood, T. S., Currey, M. C., Shiver, A. L., Lewis, Z. A., Selker, E.  
269 U., Cresko, W. A., & Johnson, E. A. (2008) Rapid SNP discovery and genetic mapping  
270 using sequenced RAD markers. *PLoS One*, **3**, e3376.  
271 <https://doi.org/10.1371/journal.pone.0003376>
- 272 Bayerl, H., Kraus, R.H.S., Nowak, C., Foerster, D.W., Fickel, J., & kuehn, R. (2017) Fast and  
273 cost-effective single nucleotide polymorphism (SNP) detection in the absence of a  
274 reference genome using semideep next-generation Random Amplicon Sequencing  
275 (RAMseq). *Molecular Ecology Resources*, <https://doi.org/10.1111/1755-0998.12717>
- 276 Catchen, J. M., Hohenlohe, P. A., Bernatchez, L., Funk, W. C., Andrews, K. R., & Allendorf, F.  
277 W. (2017) Unbroken: RADseq remains a powerful tool for understanding the genetics of  
278 adaptation in natural populations. *Molecular Ecology Resources*, **17**, 362-365.
- 279 Chen, Q., Ma, Y., Yang, Y., Chen, Z., Liao, R., Xie, X., Wang, Z., He, P., Tu, Y., Zhang, X.,  
280 Yang, C., Yang, H., Yu, F., Zheng, Y., Zhang, Z., Wang, Q., & Pan, Y. (2013)  
281 Genotyping by Genome Reducing and Sequencing for Outbred Animals. *PLoS One* **8**,  
282 e67500. <https://doi.org/10.1371/journal.pone.0067500>
- 283 Davey, J. W., Hohenlohe, P. A., Etter, P. D., Boone, J. Q., Catchen, J. M., & Blaxter, M. L.  
284 (2011) Genome-wide genetic marker discovery and genotyping using next-generation  
285 sequencing. *Nature Reviews Genetics*, **12**, 499-510
- 286 Eaton, D. A. R. (2014) PyRAD: assembly of *de novo* RADseq loci for phylogenetic analyses.  
287 *Bioinformatics*, **30**, 1844-1849.
- 288 Elshire, R.J., Glaubitz, J. C., Poland, J. A., Kawamoto, K., Buckler, E. S., & Mitchell, S. E.  
289 (2011) A robust, simple genotyping-by-sequencing (GBS) approach for high diversity  
290 species. *PLoS One*, **6**, e19379. <https://doi.org/10.1371/journal.pone.0019379>
- 291 Flaherty, M. (2017) Resignations at 'Third World Quarterly'. *Inside Higher Ed*. Retrieved from  
292 [https://www.insidehighered.com/news/2017/09/20/much-third-world-quarterlys-editorial-](https://www.insidehighered.com/news/2017/09/20/much-third-world-quarterlys-editorial-board-resigns-saying-controversial-article)  
293 [board-resigns-saying-controversial-article](https://www.insidehighered.com/news/2017/09/20/much-third-world-quarterlys-editorial-board-resigns-saying-controversial-article)

- 294 Flanagan, S. P., & Jones, A. G. (2017) Substantial differences in bias between single-digest and  
295 double-digest RAD-seq libraries: a case study. *Molecular Ecology Resources*,  
296 <https://doi.org/10.1111/1755-0998.12734>
- 297 Franchini, P. Parera, D. M., Kautt, A. F., & Meyer, A. (2017) quaddRAD: a new high-  
298 multiplexing and PCR duplicate removal ddRAD protocol produces novel evolutionary  
299 insights in a nonradiating cichlid lineage. *Molecular Ecology*, **28**, 2783-2795.
- 300 Fu, Z., Epstein, B., Kelley, J. L., Zheng, Q., Bergland, A. O., Carrillo, C. I. C., Jensen, A. S.,  
301 Dahan, J., Karasev, A. V., & Snyder, W. E. (2017) Using NextRAD sequencing to infer  
302 movement of herbivores among host plants. *PLoS One*, **12**, e0177742.  
303 <https://doi.org/10.1371/journal.pone.0177742>
- 304 Gallien, M. and Roelofs, P. (2017) What the success of a journal article supporting colonialism  
305 says about academia in a clickbait era. *Scroll.in*. Retrieved from  
306 [https://scroll.in/article/851215/after-the-media-the-lure-of-clickbait-has-taken-over-](https://scroll.in/article/851215/after-the-media-the-lure-of-clickbait-has-taken-over-academia)  
307 [academia](https://scroll.in/article/851215/after-the-media-the-lure-of-clickbait-has-taken-over-academia)
- 308 Goodwin, S., McPherson J. D., & McCombi, W. R. (2016) Coming of age: ten years of next-  
309 generation sequencing technologies. *Nature Reviews Genetics*, **27**, 333-351.
- 310 Graham, C. F., Glenn, T. C., McArthur, A. G., Boreham, D. R., Kieran, T., Lance, S., Manzon, R.  
311 G., Martino, J. A., Pierson, T., Rogers, S. M., Wilson, J. Y., & Somers, C. M. (2015)  
312 Impacts of degraded DNA on restriction enzyme associated DNA sequencing (RADseq),  
313 *Molecular Ecology Resources*, **15**, 1304-1315.
- 314 Guo, Y., Fang, D., Song, L., Liu, Y., Liu, Y., Wu, L., Yu, J., Li, Z., Xu, X., & Zhang, H. (2014)  
315 An improved 2b-RAD approach (I2B-RAD) offering genotyping tested by a rice (*Oryza*  
316 *sativa* L.) F2 population. *BMC genomics*, **15**, 956.
- 317 Hadfield, J., & Retief, J. (2018) A profusion of confusion in NGS methods naming. *Nature*  
318 *Methods*, **15**, 7-8.
- 319 Hilario, E., Barron, L., Deng, C. H., Datson, P. M., De Silva, N., Davy, M. W., & Storey, R. D.  
320 (2015). Random tagging genotyping by sequencing (rtGBS), an unbiased approach to  
321 locate restriction enzyme sites across the target genome. *PLoS One*, **10**, e0143193.  
322 <https://doi.org/10.1371/journal.pone.0143193>
- 323 Hoffberg, S. L., Kieran, T. J., Catchen, J. M., Devault, A. Faircloth, B. C., Mauricio, R., &  
324 Glenn, T. C. (2016) RADcap: sequence capture of dual-digest RADseq libraries with  
325 identifiable duplicates and reduced missing data. *Molecular Ecology Resources*, **16**, 1264-  
326 1278.
- 327 Jiang, Z., Wang, H., Michal, J. J., Zhou, X., Liu, B., Solberg Woods, L. C., & Fuchs, R. A.  
328 (2016) Genome wide sampling sequencing for SNP genotyping: methods, challenges, and  
329 future development. *Int. J. Biol. Sci.*, **12**, 100-108.
- 330 KeyGene (2016). *KeyGene's SBG patent upheld by the USPTO after ex parte reexamination*.  
331 [online] Available at: [http://www.keygene.com/wp-content/uploads/2016/03/Press-](http://www.keygene.com/wp-content/uploads/2016/03/Press-release-KeyGenes-SBG-patent-upheld-by-the-USPTO-after-ex-parte-reexamination.pdf)  
332 [release-KeyGenes-SBG-patent-upheld-by-the-USPTO-after-ex-parte-reexamination.pdf](http://www.keygene.com/wp-content/uploads/2016/03/Press-release-KeyGenes-SBG-patent-upheld-by-the-USPTO-after-ex-parte-reexamination.pdf)  
333 [Accessed 20 Nov. 2017].
- 334 Lowry, D. B., Hoban, S., Kelley, J. L., Lotterhos, K. E., Reed, L. K., Antolin, M. F., & Storfer,  
335 A. (2016) Breaking RAD: an evaluation of the utility of restriction site-associated DNA  
336 sequencing for genome scans of adaptation. *Molecular Ecology Resources*, **17**, 142-152.



- 337 Lowry, D. B., Hoban, S., Kelley, J. L., Lotterhos, K. E., Reed, L. K., Antolin, M. F., & Storfer,  
338 A. (2017) Responsible RAD: Striving for best practices in population genomic studies of  
339 adaptation. *Molecular Ecology Resources*, **17**, 366-369.
- 340 Mascher, M., Wu, S., St. Amand, P., Stein, N., & Poland, J. (2013) Application of genotyping-  
341 by-sequencing on semiconductor sequencing platforms: a comparison of genetic and  
342 reference-based marker ordering in barley. *PLoS One*, **8**, e76925.  
343 <https://doi.org/10.1371/journal.pone.0076925>
- 344 McKinney G. J., Larson, W. A., Seeb, L. W., & Seeb, J. E. (2017) RADseq provides  
345 unprecedented insights into molecular ecology and evolutionary insights: comment on  
346 Breaking RAD by Lowry *et al.* (2016). *Molecular Ecology Resources*, **17**, 356-361.
- 347 Miller, M. R., Dunham, J. P., Amores, A., Cresko, W. A., & Johnston, E. A. (2007) Rapid and  
348 cost-effective polymorphism identification and genotyping using restriction site  
349 associated DNA (RAD) markers. *Genome Research*, **17**, 240-248.
- 350 Narum, S. R., Buerkle, C. A., Davey, J. W., Miller, M. R., & Hohenlohe, P. A. (2013)  
351 Genotyping-by-sequencing in ecological and conservation genomics. *Molecular Ecology*,  
352 **22**, 2841-2847.
- 353 NUAP (no unnecessary acronyms please). (2011) *Nature Methods*, **8**, 521.
- 354 Ott, A., Liu, S., Schnable, J.C., Yeh, C.-T., Wang, K.-S., & Schnable, P.S. (2017) tGBS®  
355 genotyping-by-sequencing enables reliable genotyping of heterozygous loci. *Nucleic  
356 Acids Research*, **45**, e178. <https://doi.org/10.1093/nar/gkx853>
- 357 Peterson, B. K., Weber, J. N., Kay, E. H., Fisher, H. S., & Hoekstra, H. E. (2012) Double digest  
358 RADseq: an inexpensive method for *de novo* SNP discovery and genotyping in model and  
359 non-model species. *PLoS One*, **7**, e37135. <https://doi.org/10.1371/journal.pone.0037135>
- 360 Poland, J. A., Brown, P. J., Sorrells, M. E., & Jannink, J. (2012) Development of high-density  
361 genetic maps for barley and wheat using a novel two-enzyme genotyping-by-sequencing  
362 approach. *PLoS One*, **7**, e32253. <https://doi.org/10.1371/journal.pone.0032253>
- 363 Puritz, J. B., Matz, M. V., Toonen, R. J., Weber, J. N., Bolnick, D. I., & Bird, C. E. (2014)  
364 Demystifying the RAD fad. *Molecular Ecology*, **23**, 5937-5942.
- 365 Recknagel, H. Jacobs, A., Herzyk., P., & Elmer, K. R. (2015) Double-digest RAD sequencing  
366 using ion proton semiconductor platform (ddRADseq-ion) with nonmodel organisms.  
367 *Molecular Ecology Resources*, **15**, 1316-1329.
- 368 Rife, T. W., Wu, S., Bowden, R. L., & Poland, J. A. (2015) Spiked GBS: a unified, open platform  
369 for single marker genotyping and whole-genome profiling. *BMC Genomics*, **16**, 248.
- 370 Schield, D.R., Walsh, M.R., Card, D.C., Andrew, A.L., Adams, R.H., Castoe, T.A., & Bunce, M.  
371 (2016) EpiRADseq: scalable analysis of genomewide patterns of methylation using next-  
372 generation sequencing. *Methods in Ecology and Evolution*, **7**, 60-69.
- 373 Schmid, S., Genevest, R., Gobet, E., Suchan, T., Sperisen, C., Tinner, W., & Alvarez, N. (2017)  
374 hyRAD-X, a versatile method combining exome capture and RAD sequencing to extract  
375 genomic information from ancient DNA. *Methods in Ecology and Evolution*,  
376 <https://doi.org/10.1111/2041-210X.12785>
- 377 Shakespeare, W. 1591-94. "Romeo and Juliet" *The complete works of William Shakespeare  
378 comprising his plays and poems*, The World Syndicate Publishing Company, 1930, pp.  
379 901.
- 380 Shakespeare, W. 1605-08. "Coriolanus" *The complete works of William Shakespeare comprising  
381 his plays and poems*, The World Syndicate Publishing Company, 1930, pp. 703.

- 382 Sonah, H., Bastien, M., Iquira, E., Tardivel, A., Légaré, G., Boyle, B., Normandeau, É., Larose,  
383 S., Jean, M., & Belzile, F. (2013) An improved Genotyping by Sequencing (GBS)  
384 approach offering increased versatility and efficiency of SNP discovery and genotyping.  
385 *PLoS One*, **8**, e54603. <https://doi.org/10.1371/journal.pone.0054603>
- 386 Stolle, E., & Moritz, R. F. A. (2013) RESTseq - Efficient benchtop population genomics with  
387 RESTriction Fragment SEQuencing. *PLoS One*, **8**, e63960.  
388 <https://doi.org/10.1371/journal.pone.0063960>
- 389 Suchan, T., Pitteloud, C., Gerasimova, N. S., Kostikova, A., Schmid, S., Arrigo, N., Pajkovic, M.,  
390 Ronikier, M., & Alvarez, N. (2016) Hybridization capture using RAD probes (hyRAD), a  
391 new tool for performing genomic analyses on collection specimens. *PLoS One*, **11**,  
392 e0151651. <https://doi.org/10.1371/journal.pone.0151651>
- 393 Sun, X., Liu, D., Zhang, X., Li, W., Liu, H., Hong, W., Jiang, C., Guan, N., Ma, C., Zeng, H., Xu,  
394 C., Song, J., Huang, L., Wang, C., Shi, J., Wang, R., Zheng, X., Lu, C., Wang, X., &  
395 Zheng, H. (2013) SLAF-seq: An efficient method of large-scale De Novo SNP discovery  
396 and genotyping using high-throughput sequencing. *PLoS One*, **8**, e58700.  
397 <https://doi.org/10.1371/journal.pone.0058700>
- 398 Suyama, Y., & Matsuki, Y. (2015) MIG-seq: an effective PCR-based method for genome-wide  
399 single nucleotide polymorphism genotyping using the next-generation sequencing  
400 platform. *Scientific Reports*, **5**, 16963. <https://doi.org/10.1038/srep16963>
- 401 Toonen, R. J., Puritz, J. B., Forsman, Z. H., Whitney, J. L., Fernandez-Silva, I., Andrews, K. R.,  
402 & Bird, C. E. (2013) ezRAD: a simplified method for genomic genotyping in non-model  
403 organisms. *PeerJ*, **1**, e203. <https://doi.org/10.7717/peerj.203>
- 404 Trucchi, E., Mazzarella, A. B., Gilfillan, G. D., Lorenzo, M. T., Schönswetter, P., & Paun, O.  
405 (2016) BsRADseq: screening DNA methylation in natural populations of non-model  
406 species. *Molecular Ecology*, **25**, 1697-1713.
- 407 Truong, H. T., Ramos, A. M., Yalcin, F., de Ruiter, M., van der Poel H. J. A., Huvenaars, K. H.  
408 J., Hogers, R. C. J., van Enckevort, L. J. G., Janssen, A., van Orsouw, N. J., & van Eijk, J.  
409 T. (2012) Sequence-based genotyping for marker discovery and co-dominant scoring in  
410 germplasm and populations. *PLoS One*, **7**, e37565.  
411 <https://doi.org/10.1371/journal.pone.0037565>
- 412 van Dijk, E. L., Jaszczyszyn, Y., & Thermes, C. (2014) Library preparation methods for next-  
413 generation sequencing: Tone down the bias. *Experimental Cell Research*, **32**, 12-20.
- 414 van Gorp, T. P., Wagemaker, N. C. A. M., Wouters, B., Vergeer, P., Ouborg, J. N. J., &  
415 Verhoeven, K. J. F. (2016) epiGBS: reference-free reduced representation bisulfite  
416 sequencing. *Nature Methods*, **13**, 322-328.
- 417 van Orsouw, N. J., Hogers, R. C. J., Janssen, A., Yalcin, F., Snoeihers, S., Verstege, E.,  
418 Schneiders, H., van der Poel, H., van Oeveren, J., Verstegen, H., & van Eijk, M. J. T.  
419 (2007) Complexity reduction of polymorphic sequences (CRoPs<sup>TM</sup>): a novel approach for  
420 large-scale polymorphism discovery in complex genomes. *PLoS One*, **2**, e1172.  
421 <https://doi.org/10.1371/journal.pone.0001172>
- 422 Van Tassell, C. P., Smith, T. P. L., Matukumalli, L. K., Taylor, J. F., Schnabel, R. D., Lawley, C.  
423 T., Haudenschild, C. D., Moore, S. S., Warren, W. C., & Sonstegard, T. S. (2008) SNP  
424 discovery and allele frequency estimation by deep sequencing of reduced representation  
425 libraries. *Nature Methods*, **5**, 247-252.



426 Wang, S., Meyer, E., McKay, J. K., & Matz, M. V. (2012) 2b-RAD: a simple and flexible  
427 method for genome-wide genotyping. *Nature Methods*, **9**, 808-812.  
428 Yang, G., Chen, Y., Wang, J., Guo, C., Zhao, L., Wang, X., Guo, Y., Li, L., Li, D., & Guo, Z.  
429 (2016) Development of a universal and simplified ddRAD library preparation approach  
430 for SNP discovery and genotyping in angiosperm plants. *Plant Methods*, **12**, 39.  
431  
432  
433  
434  
435  
436  
437  
438  
439  
440  
441  
442  
443  
444  
445  
446  
447  
448  
449  
450  
451

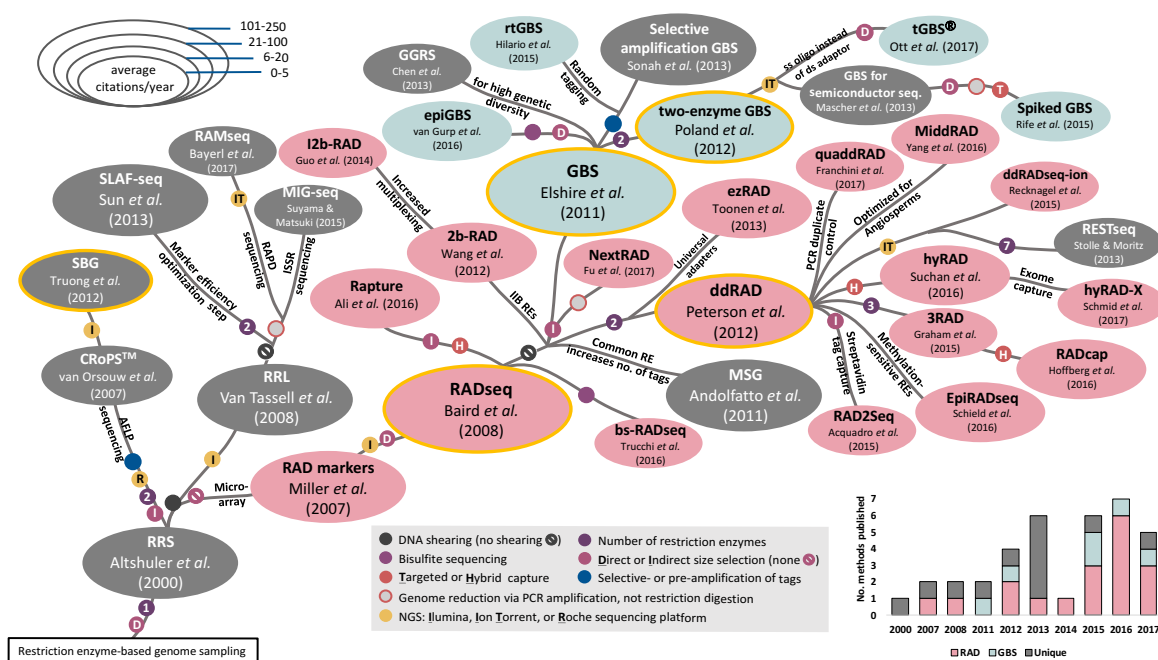

Figure 1. Concept map displaying methodological and etymological relationships among 36 reduced representation genome-sampling methods and their derivatives. Branches connect derived methods to their inferred parent protocols, and significant differences between protocols are indicated by coloured circles on branches. Variations that originate only once are indicated by text along branches. Red ellipses indicate named methods using the “RAD” acronym, blue ellipses indicate names derived from “GBS”, and methods with unique names, or lacking names altogether, are in grey. The five methods used to assess attribution rates in an accompanying literature review (Fig. 2) are indicated by ellipses with a gold outline. Inset histogram shows accumulation of methods by year. See Table S1 for a summary of each method.

453

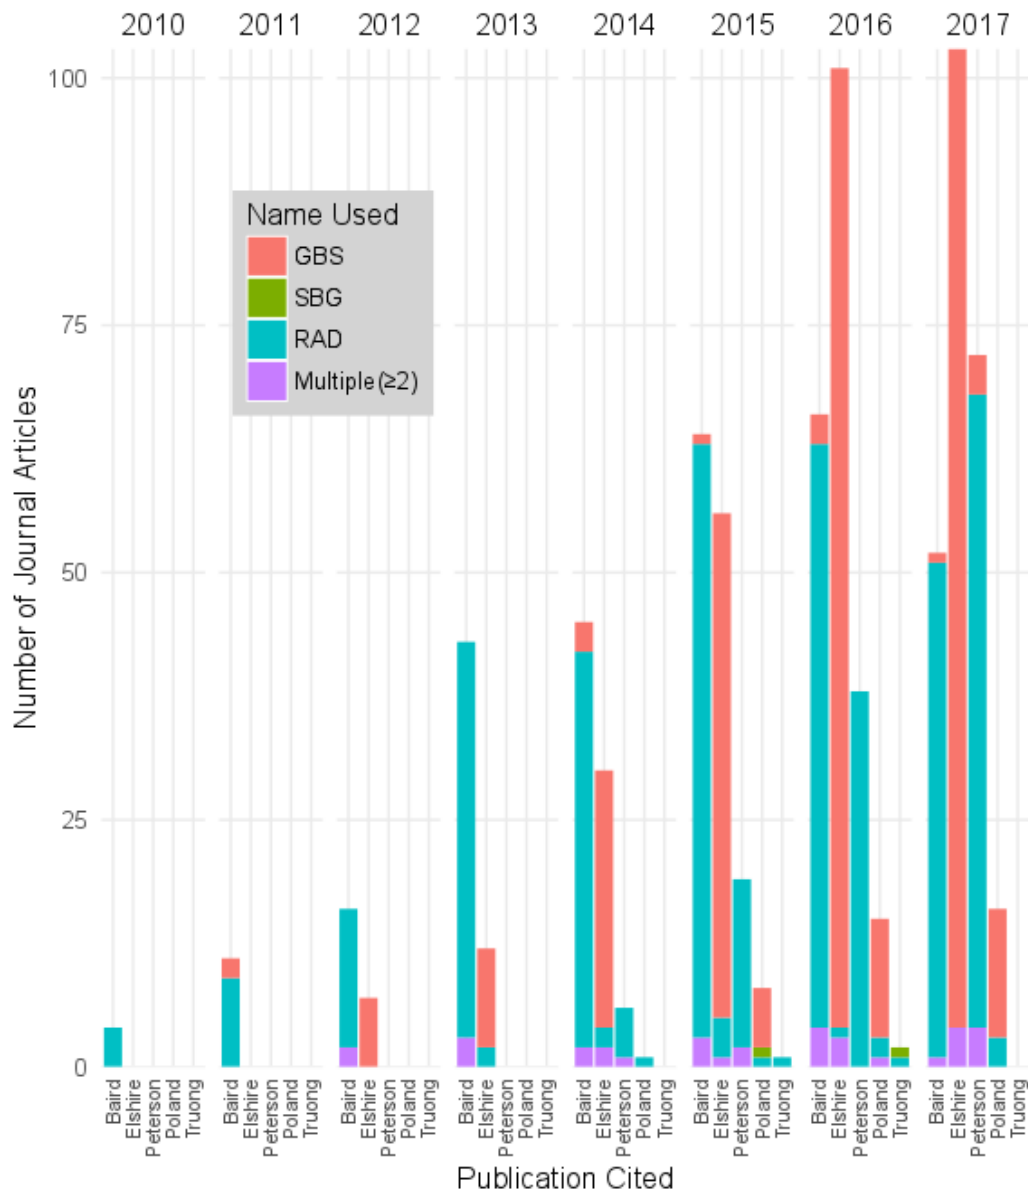

Figure 2. Trends in the use of the names “GBS” (from Elshire *et al.* (2011) and Poland *et al.* (2012)), “SBG” (from Truong *et al.* (2012)), and “RAD” (from Baird *et al.* (2008) and Peterson *et al.* (2012)) in the title, abstract, or keywords of journal articles that cite either Baird *et al.* (2008), Elshire *et al.* (2011), Poland *et al.* (2012), Truong *et al.* (2012) or Peterson *et al.* (2012). Bars indicate the number of journal articles citing each publication, while colours indicate the number referring to each name. About 8.4% of papers use an ambiguous or incorrect name in reference to the cited method (e.g. ~4% of papers uniquely citing Baird *et al.* (2008) in 2017 refer specifically to GBS or SBG alone or in combination with RAD, despite neither name being used in that paper).
